# Supplementary material for: Spatial Disparities in Air Conditioning Ownership in Florida, United States
Source: Research Square preprint supplement (doi:10.21203/rs.3.rs-1321547/v1), 2022-02-08
Supplement: Supplementary file 1 [file c4bfc4ce28fdcab6c8a9d9a3.docx]

**Appendix I**


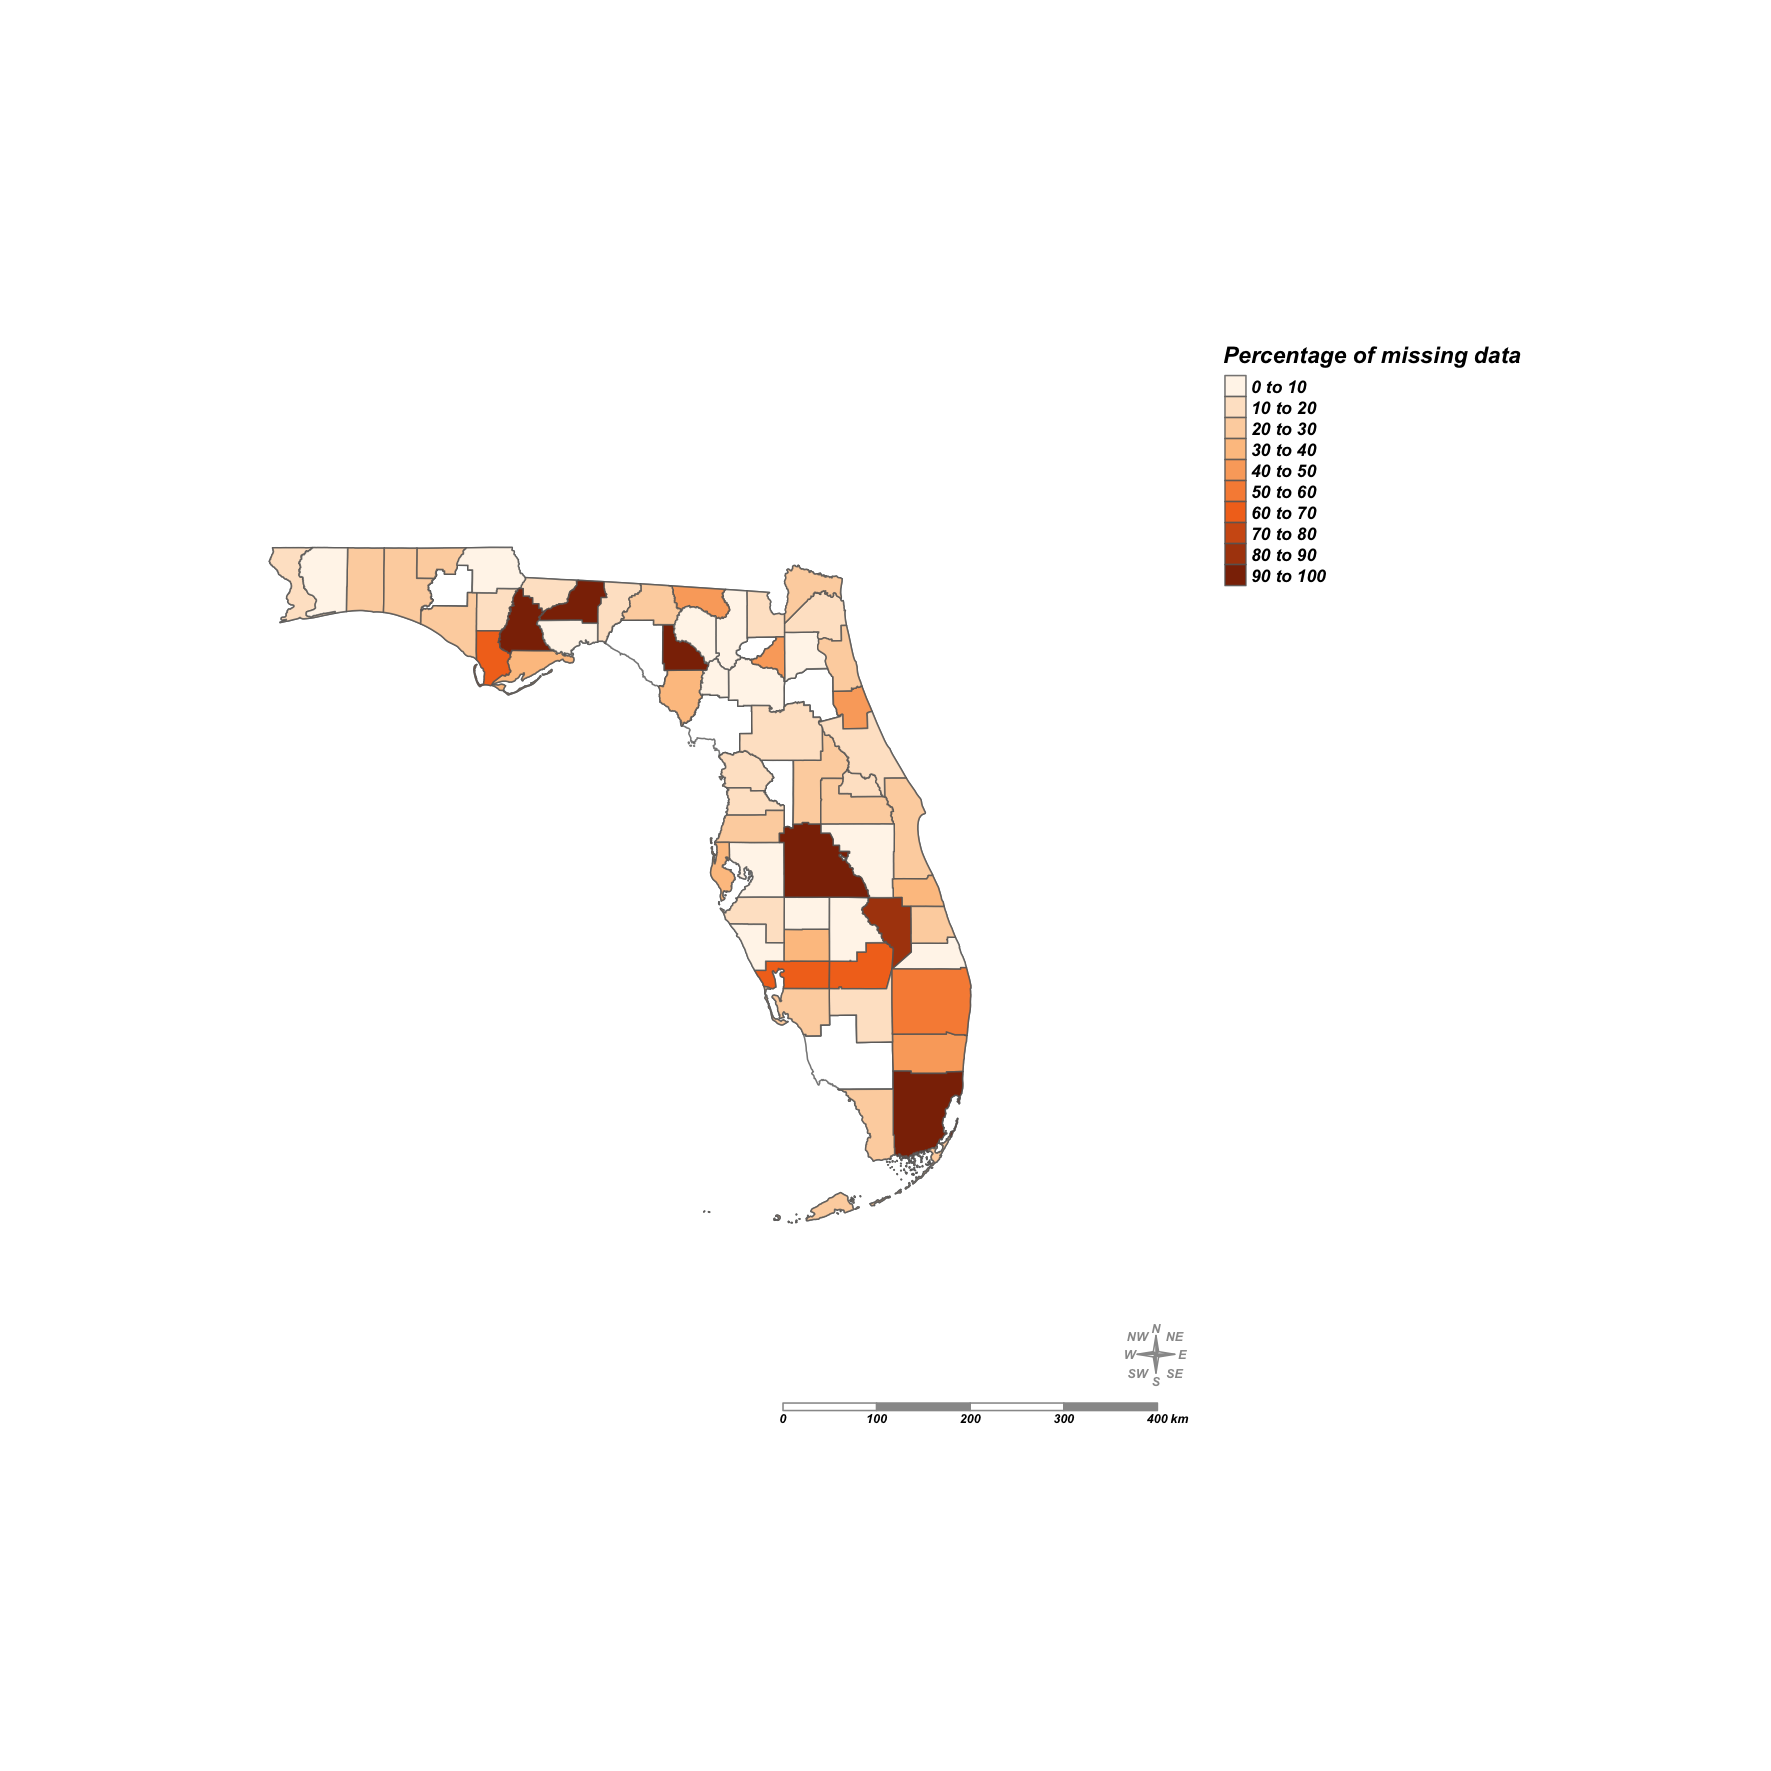


**Figure 1. Percentage of missing data at county level**

**Table 1 Summary of data in Florida**

|  | **Min.** | **Median** | **Mean** | **Max.** | **SD.** |
| --- | --- | --- | --- | --- | --- |
| Built year | 1905 | 1970 | 1972 | 2020 | 17.47 |
| Total area of property (square ft) | 240 | 1461 | 5234 | 831358 | 21518.11 |
| Over 65 year old live alone | 0 | 189 | 240.3 | 5285 | 209.90 |
| Black African | 0 | 364 | 806.8 | 11482 | 1137.06 |
| Hispanic or Latino | 0 | 648 | 1285.6 | 14269 | 1650.66 |
| Median Household Income ($) | 9463 | 54176 | 59694 | 250001 | 97609312 |
| Value ($) | 0 | 1069 | 1218.4 | 20222 | 879.99 |
| Total population | 249 | 4524 | 5025 | 39928 | 3033.08 |
| Historical Black African | 0 | 86.0 | 595.5 | 14587.0 | 1303.09 |
